# Supplementary material for: A water-stable, light-weight, MOF-based membrane for mitigating polysulfide shuttling in Li–S batteries
Source: Royal Society of Chemistry journal article supplement (doi:10.1039/d2dt02956a), 2022-01-01
Supplement: d2dt02956a1.pdf [file d2dt02956a1.pdf]

## Supplementary Information

### **A water-stable, light-weight, MOF-based membrane for mitigating polysulfides shuttling in Li-S batteries**

Juan Xu, Zheng Lin, Yuan Lei, Xingrun Huang, Chao Chen\*

*School of Chemical Engineering and Light Industry, Guangdong University of Technology, Guangzhou 510006, China.*

E-mail: [c.chen@gdut.edu.cn](mailto:c.chen@gdut.edu.cn)

## **Experimental section**

### ***Synthesis of PLMOF(Co)***

PLMOF(Co) was prepared via a conventional hydrothermal method [1]. Typically, 1.5 mmol  $\text{Co}(\text{NO}_3)_2 \cdot 6\text{H}_2\text{O}$  was dissolved in 5 mL deionized water by stirring to form the solution A. 1.5 mmol NaOH, 1 mmol 4, 5-imidazole dicarboxylic acid and 1 mmol 4, 4' - bipyridine were added into 5 mL deionized water with stirring to form the solution B. Solution A and B were mixed to form a mixture, which was transferred into a 25 mL teflon-lined autoclave and kept statically under autogenous pressure at 180 °C for 72 hours. The resultant solid were washed with  $\text{H}_2\text{O}$  and finally dried to obtain the PLMOF (Co) product.

### ***Fabrication of the PLMOF (Co)@G-coated separator***

In a typical procedure, 5.4 mg of PLMOF (Co), 12.6 mg of graphene, and 2 mg of PVDF was dispersed in NMP by sonication for 1 hour to form a uniform black suspension.

Specific amount of the above suspension was then deposited onto a Celgard 2400 separator by a vacuum filter. The loading amount of PLMOF (Co)@G on the PP separator was controlled to be 0.32 mg cm<sup>-2</sup>, 0.16 mg cm<sup>-2</sup>, and 0.08 mg cm<sup>-2</sup>, respectively.

### ***Visualized polysulfide adsorption and permeation tests***

Li<sub>2</sub>S<sub>6</sub> solution (0.2 M) was firstly prepared by mixing sublimed sulfur and Li<sub>2</sub>S in DOL/DME solution (1:1 in vol), which was stirred at 70 °C for 12 h in the glovebox. For the adsorption test, the Li<sub>2</sub>S<sub>6</sub> solution was diluted to 2 mM. 50 mg PLMOF (Co) was added to 6 mL Li<sub>2</sub>S<sub>6</sub> solution for 7 h. For the diffusion test, the Li<sub>2</sub>S<sub>6</sub> solution was diluted to 10 mM. The permeation process of polysulfides through the PP separator and the PLMOF (Co) @G-modified separator was tested using an H-type cell filled with dark brown Li<sub>2</sub>S<sub>6</sub> solution (left) and pellucid DOL/DME solution (right).

### ***Cells assembly and electrochemical measurements***

S/CNT composite (S: CNT = 8:2 in mass) was firstly prepared using a melting diffusion method. Then the S/CNT composite, CNT and PVDF were mixed at a mass ratio of 7:2:1 in NMP to obtain the cathode slurry, which was coated on an aluminum foil, dried at 60 °C under vacuum, and cut into a 14 mm diameter plate. The average sulfur loading on the cathode was controlled to be 1.0 mg cm<sup>-2</sup>. The electrolyte is consist of 1 M LiTFSI in DOL/DME (1 : 1 in v/v) with 1% LiNO<sub>3</sub> as an additive, and the electrolyte dosage was 15 μL mg<sup>-1</sup> S. The galvanostatic charge/discharge (GCD) and cycle performance were measured using a LAND battery system in the range of 1.7–2.8 V. The cyclic voltammetry (CV) and electroelectrochemical impedance spectrascopy (EIS) were performed on a CHI 650E electrochemical station. The voltage test window for the CV curve is 1.7 to 2.8 V

with a scan rate of 0.1 mV s<sup>-1</sup>. EIS was performed over the scanning frequency range of 0.01 Hz-100 kHz.

### ***Material characterization***

XRD patterns were recorded using a Rigaku-mini Flex600 X-ray diffractometer (Cu K $\alpha$   $\lambda$ =1.54059 Å). The content of S was determined by a thermogravimetric analyzer (NETZSCH TG 209 F3) under argon atmosphere with a heating rate of 5 °C min<sup>-1</sup>. X-ray photoelectron spectroscopy (XPS) was performed on an Escalab 250Xi (Thermo Fisher) with Al K $\alpha$  radiation under argon atmosphere. Textural properties of samples were obtained by N<sub>2</sub> adsorption-desorption measurement carried out on the Belsorp-mini (II) under liquid nitrogen temperature (-196 °C). Morphologies of samples were characterized by a field-emission scanning electron microscope (FE-SEM, ZEISS sigma500) at 15 Kv and transmission electron microscope (TEM, JEOL JEM-2100 F) with energy dispersive X-ray spectroscopy (EDS). The content of metal atom was determined by the Agilent 725 inductively coupled plasma optical emission spectrometer (ICP). The UV-Vis absorption spectra were obtained using a Persee TU-1900 spectrophotometer.

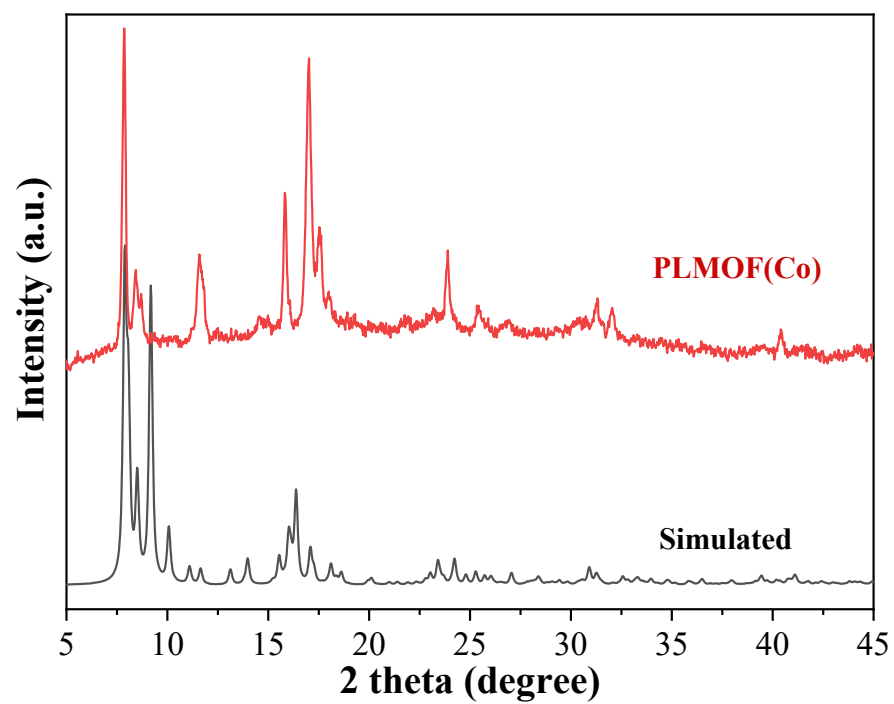

**Fig. S1** XRD pattern of the PLMOF(Co).

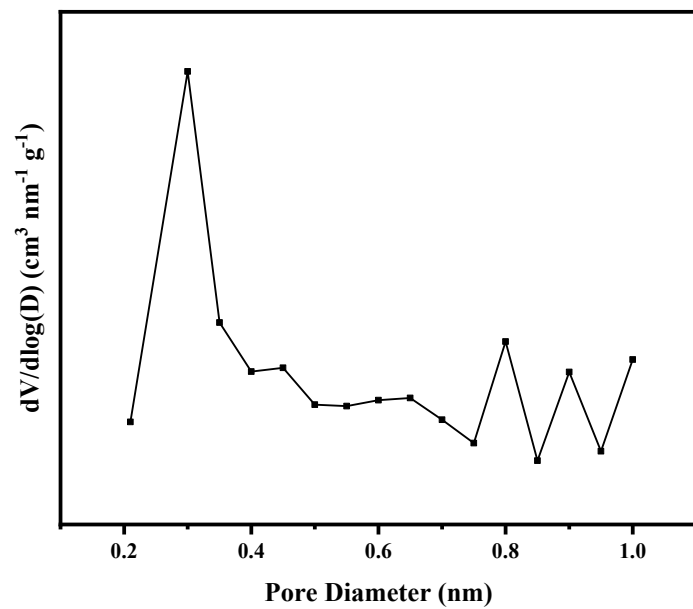

**Fig. S2** Micropore size distribution curve of the PLMOF(Co) based on the MP-plot.

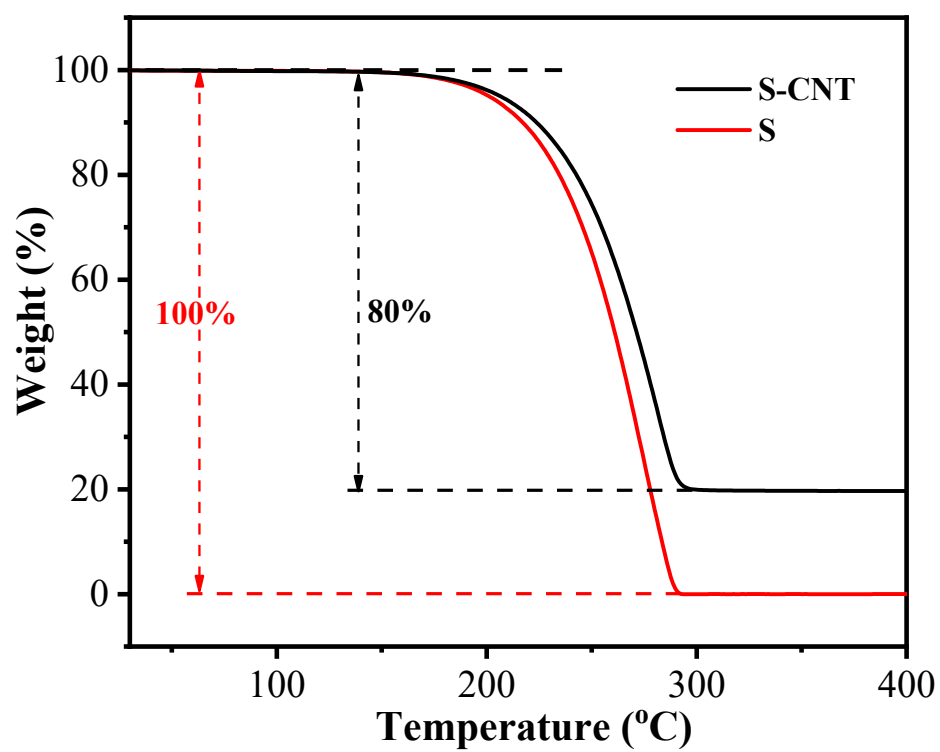

**Fig. S3** TGA curves of sulfur and the S/CNT composite.

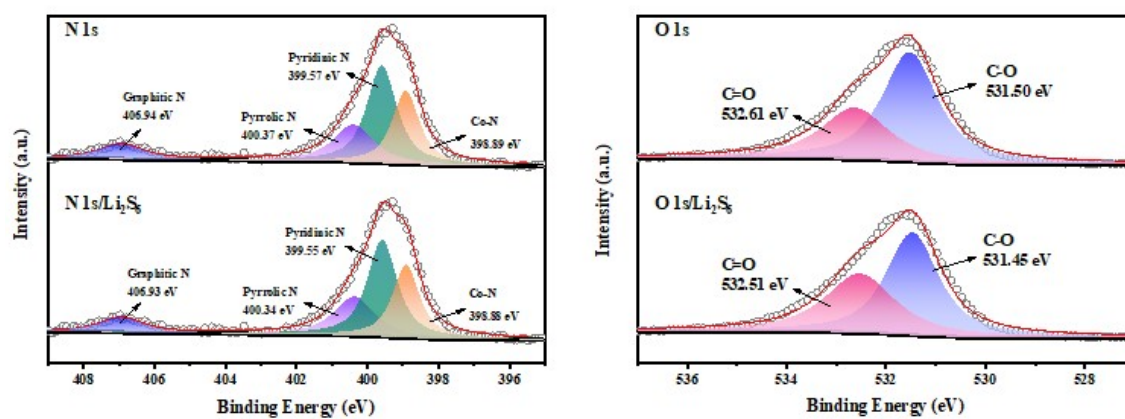

**Fig. S4** High-resolution N1s and O1s XPS spectra of the PLMOF(Co) before and after  $\text{Li}_2\text{S}_6$  adsorption

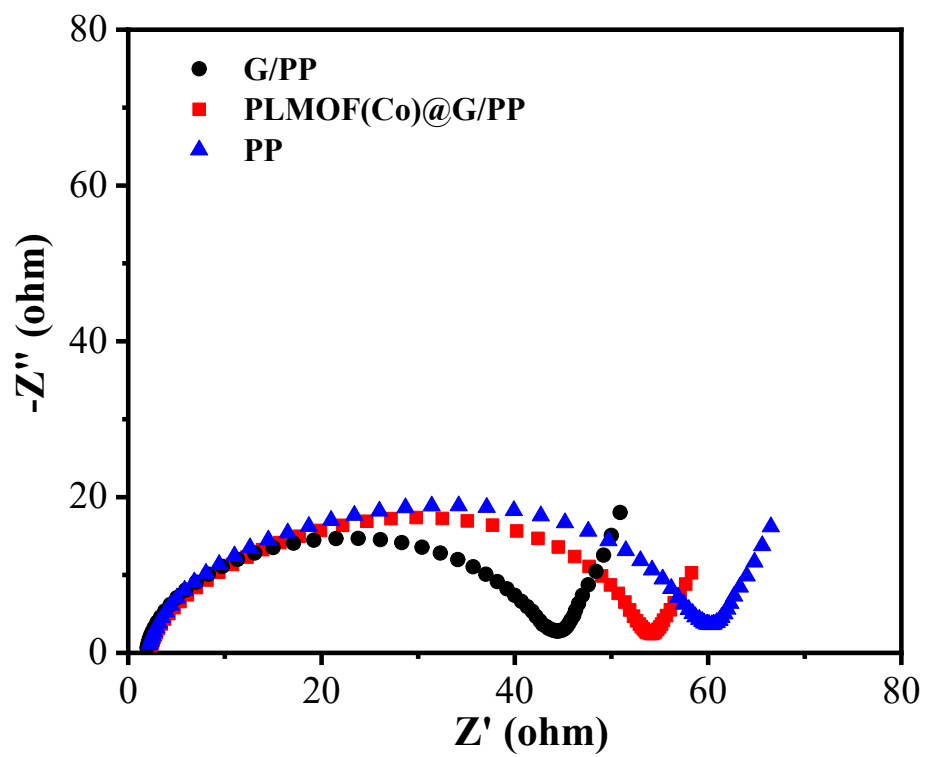

**Fig. S5** Nyquist plots of cells assembled with different separators.

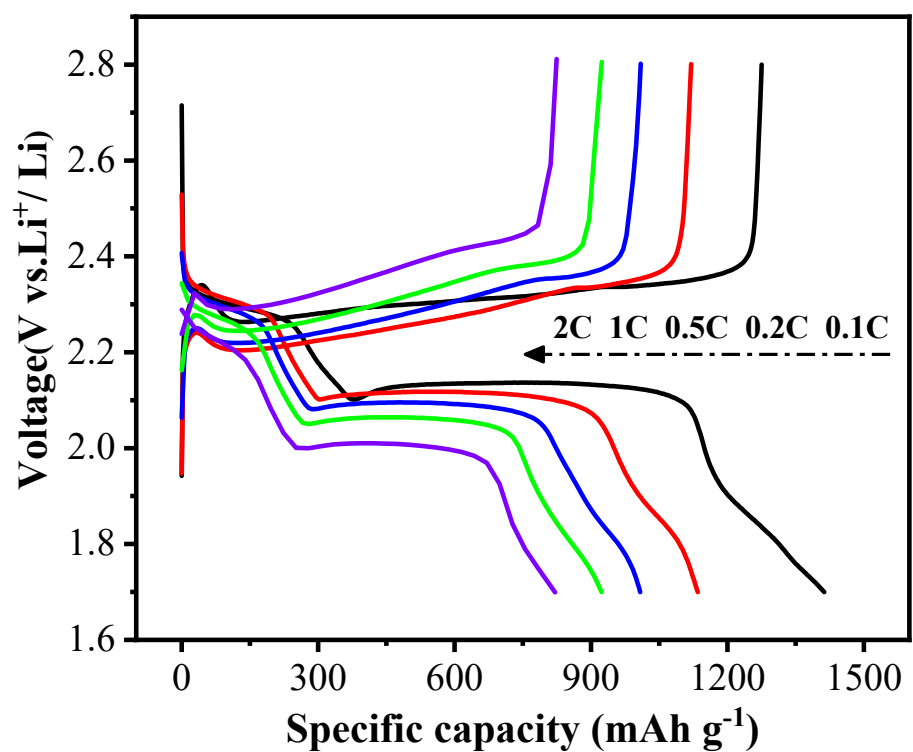

**Fig. S6** Galvanostatic discharge-charge profile of the cell assembled with the PLMOF(Co)@G-modified separator.

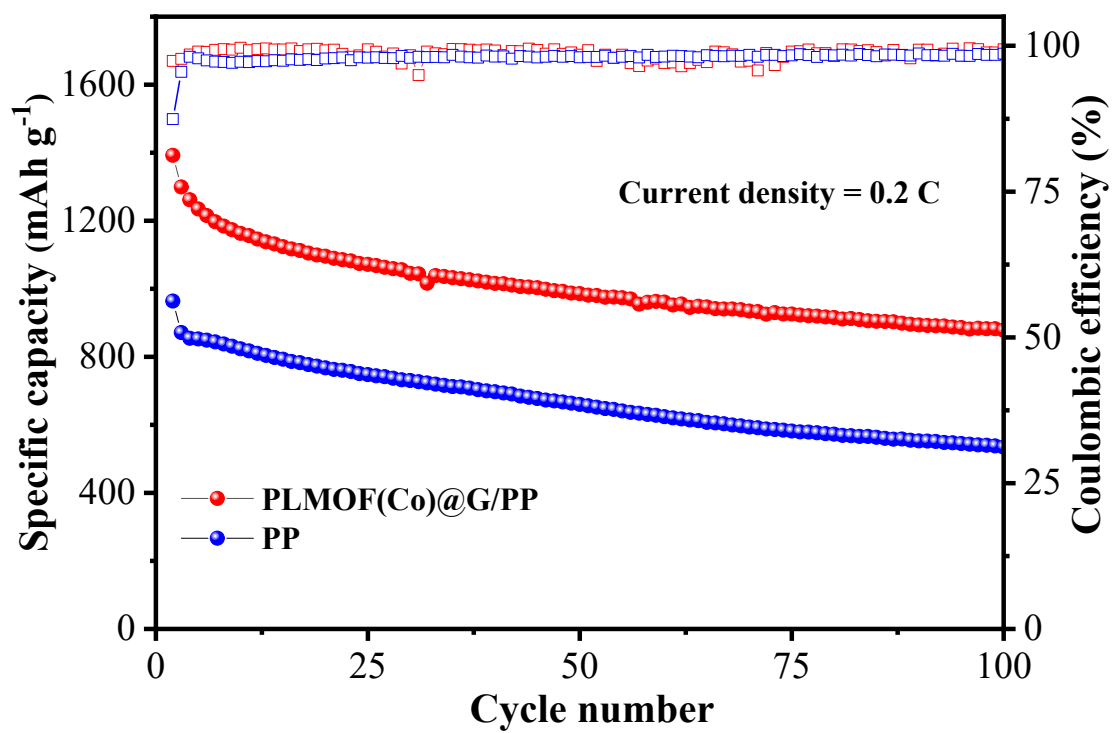

**Fig. S7** A comparison of cycle performances of cells assembled with PP and PLMOF(Co)@G-modified separator.

**Table S1. A comparison of Li-S battery performance based on the PLMOF(Co)@G-modified separator in this work with other previously reported works.**

| <b>Interlayer Materials</b>             | <b>Cathode</b>   | <b>C Rate</b> | <b>1<sup>st</sup> Capacity (mAh g<sup>-1</sup>)</b> | <b>Cycle</b> | <b>Capacity retention (mAh g<sup>-1</sup>)</b> | <b>Ref.</b>                            |
|-----------------------------------------|------------------|---------------|-----------------------------------------------------|--------------|------------------------------------------------|----------------------------------------|
| <b>Y-FTZB</b>                           | <b>S/Super P</b> | <b>0.25</b>   | <b>987</b>                                          | <b>100</b>   | <b>~650</b>                                    | <b>[2]<br/>ACS Energy Lett.</b>        |
| <b>Ni<sub>3</sub>(HITP)<sub>2</sub></b> | <b>S/CNT</b>     | <b>0.5</b>    | <b>990</b>                                          | <b>200</b>   | <b>905</b>                                     | <b>[3]<br/>Adv. Energy Mater.</b>      |
| <b>B/2D MOF-Co</b>                      | <b>S/C</b>       | <b>0.5</b>    | <b>801</b>                                          | <b>200</b>   | <b>703</b>                                     | <b>[4]<br/>Adv. Mater.</b>             |
| <b>CNT@ZIF-30</b>                       | <b>S/AB</b>      | <b>0.2</b>    | <b>1588</b>                                         | <b>100</b>   | <b>870</b>                                     | <b>[5]<br/>Energy Stor. Mater.</b>     |
| <b>PSS@HKUST-1</b>                      | <b>S/Super P</b> | <b>0.5</b>    | <b>1243</b>                                         | <b>100</b>   | <b>968</b>                                     | <b>[6]<br/>ACS Appl. Mater. Inter.</b> |
| <b>Ni<sub>3</sub>(HITP)<sub>2</sub></b> | <b>S/Super P</b> | <b>0.5</b>    | <b>-</b>                                            | <b>100</b>   | <b>~740</b>                                    | <b>[7]<br/>ACS Appl. Mater. Inter.</b> |
| <b>UiO-66-NH<sub>2</sub></b>            | <b>S/SG</b>      | <b>0.1</b>    | <b>-</b>                                            | <b>100</b>   | <b>560</b>                                     | <b>[8]<br/>J. Mater. Chem. A</b>       |
| <b>VN</b>                               | <b>S/CNT</b>     | <b>0.5</b>    | <b>1050</b>                                         | <b>100</b>   | <b>860</b>                                     | <b>[9]<br/>ACS Appl. Mater. Inter.</b> |
| <b>Cr<sub>3</sub>C<sub>2</sub></b>      | <b>S/KB</b>      | <b>0.5</b>    | <b>865</b>                                          | <b>100</b>   | <b>~795</b>                                    | <b>[10]<br/>Ind. Eng. Chem. Res.</b>   |
| <b>Co<sub>3</sub>Mo<sub>3</sub>C</b>    | <b>S/Super P</b> | <b>0.1</b>    | <b>1251</b>                                         | <b>100</b>   | <b>905</b>                                     | <b>[11]<br/>Sci. China Mater.</b>      |
| <b>Ni-Co-P@C</b>                        | <b>S/CNTs</b>    | <b>0.5</b>    | <b>1000</b>                                         | <b>100</b>   | <b>~700</b>                                    | <b>[12]</b>                            |

|                   |              |            |             |            |            |                                          |
|-------------------|--------------|------------|-------------|------------|------------|------------------------------------------|
|                   |              |            |             |            |            | <b>Energy Stor. Mater.</b>               |
| <b>FMSiNP</b>     | <b>S/KB</b>  | <b>1</b>   | <b>1080</b> | <b>400</b> | <b>660</b> | <b>[13]</b><br><b>J. Mater. Chem. A</b>  |
| <b>MWCNT/NCQD</b> | <b>S/KB</b>  | <b>2</b>   | <b>953</b>  | <b>300</b> | <b>600</b> | <b>[14]</b><br><b>Adv. Energy Mater.</b> |
| <b>PLMOF(Co)</b>  | <b>S/CNT</b> | <b>0.2</b> | <b>1392</b> | <b>100</b> | <b>878</b> | <i><b>This work</b></i>                  |
|                   |              | <b>0.5</b> | <b>1325</b> | <b>100</b> | <b>956</b> |                                          |
|                   |              | <b>0.5</b> | <b>1325</b> | <b>200</b> | <b>846</b> |                                          |
|                   |              | <b>1</b>   | <b>1043</b> | <b>300</b> | <b>720</b> |                                          |
|                   |              | <b>2</b>   | <b>832</b>  | <b>300</b> | <b>643</b> |                                          |

**Table S2. A comparison of interlayer loading amount in this work with previously reported studies.**

| <b>Interlayer Materials</b>              | <b>Areal density of interlayer (mg cm<sup>-2</sup>)</b> | <b>C Rate</b> | <b>1<sup>st</sup> Capacity (mAh g<sup>-1</sup>)</b> | <b>Cycle</b> | <b>Capacity retention (mAh g<sup>-1</sup>)</b> | <b>Ref.</b>                             |
|------------------------------------------|---------------------------------------------------------|---------------|-----------------------------------------------------|--------------|------------------------------------------------|-----------------------------------------|
| <b>Y-FTZB</b>                            | <b>1.2</b>                                              | <b>0.25</b>   | <b>987</b>                                          | <b>100</b>   | <b>~650</b>                                    | <b>[2]<br/>ACS Energy Lett.</b>         |
| <b>B/2D MOF-Co</b>                       | <b>0.37</b>                                             | <b>0.5</b>    | <b>801</b>                                          | <b>100</b>   | <b>795</b>                                     | <b>[4]<br/>Adv. Mater.</b>              |
| <b>CNT@ZIF-30</b>                        | <b>0.9</b>                                              | <b>0.2</b>    | <b>1588</b>                                         | <b>100</b>   | <b>870</b>                                     | <b>[5]<br/>Energy Stor. Mater.</b>      |
| <b>VN</b>                                | <b>1.52</b>                                             | <b>0.5</b>    | <b>1050</b>                                         | <b>100</b>   | <b>860</b>                                     | <b>[9]<br/>ACS Appl. Mater. Inter.</b>  |
| <b>Cr<sub>3</sub>C<sub>2</sub></b>       | <b>0.75</b>                                             | <b>0.5</b>    | <b>865</b>                                          | <b>100</b>   | <b>~795</b>                                    | <b>[10]<br/>Ind. Eng. Chem. Res.</b>    |
| <b>Co<sub>3</sub>Mo<sub>3</sub>C</b>     | <b>0.5</b>                                              | <b>0.1</b>    | <b>1251</b>                                         | <b>100</b>   | <b>905</b>                                     | <b>[11]<br/>Sci. China Mater.</b>       |
| <b>Ni-Co-P@C</b>                         | <b>0.4</b>                                              | <b>0.5</b>    | <b>1000</b>                                         | <b>100</b>   | <b>~700</b>                                    | <b>[12]<br/>Energy Stor. Mater.</b>     |
| <b>MWCNT/NCQD</b>                        | <b>0.15</b>                                             | <b>0.5</b>    | <b>~1120</b>                                        | <b>100</b>   | <b>~860</b>                                    | <b>[14]<br/>Adv. Energy Mater.</b>      |
| <b>UiO-66-S</b>                          | <b>1.1</b>                                              | <b>0.2</b>    | <b>1127</b>                                         | <b>100</b>   | <b>~1010</b>                                   | <b>[15]<br/>J. Mater. Chem. A</b>       |
| <b>Ti<sub>3</sub>C<sub>2</sub>Tx/S-A</b> | <b>0.7</b>                                              | <b>0.1</b>    | <b>1072</b>                                         | <b>100</b>   | <b>807</b>                                     | <b>[16]<br/>J. Alloys Compd.</b>        |
| <b>CNTs@CP/rGo</b>                       | <b>0.28</b>                                             | <b>0.5</b>    | <b>-</b>                                            | <b>100</b>   | <b>~800</b>                                    | <b>[17]<br/>ACS Appl. Energy Mater.</b> |

|           |      |     |      |     |     |                  |
|-----------|------|-----|------|-----|-----|------------------|
| PLMOF(Co) | 0.32 | 0.5 | 1325 | 100 | 956 | <i>This work</i> |
|           | 0.16 |     | 1321 |     | 854 |                  |
|           | 0.08 |     | 1215 |     | 705 |                  |

## Reference

- [1] C. Chen, Q. Jiang, H. Xu, Z. Lin, Highly efficient synthesis of a moisture-stable nitrogen-abundant metal-organic framework (MOF) for large-scale CO<sub>2</sub> capture, *Ind. Eng. Chem. Res.*, 58 (2019) 1773-1777.
- [2] M. Li, Y. Wan, J. K. Huang, A.H. Assen, C. E. Hsiung, H. Jiang, Y. Han, M. Eddaoudi, Z. Lai, J. Ming, Metal-organic framework-based separators for enhancing Li-S battery stability: mechanism of mitigating polysulfide diffusion, *ACS Energy Lett.*, 2 (2017) 2362-2367.
- [3] Y. Zang, F. Pei, J. Huang, Z. Fu, G. Xu, X. Fang, Large-area preparation of crack-free crystalline microporous conductive membrane to upgrade high energy lithium-sulfur batteries, *Adv. Energy Mater.*, 8 (2018) 1802052.
- [4] Y. Li, S. Lin, D. Wang, T. Gao, J. Song, P. Zhou, Z. Xu, Z. Yang, N. Xiao, S. Guo, Single atom array mimic on ultrathin MOF nanosheets boosts the safety and life of lithium-sulfur batteries, *Adv. Mater.*, 32 (2020) 1906722.
- [5] F. Wu, S. Zhao, L. Chen, Y. Lu, Y. Su, Y. Jia, L. Bao, J. Wang, S. Chen, R. Chen, Metal-organic frameworks composites threaded on the CNT knitted separator for suppressing the shuttle effect of lithium sulfur batteries, *Energy Stor. Mater.*, 14 (2018) 383-391.
- [6] Y. Guo, M. Sun, H. Liang, W. Ying, X. Zeng, Y. Ying, S. Zhou, C. Liang, Z. Lin, X.

Peng, Blocking polysulfides and facilitating lithium-ion transport: polystyrene sulfonate@HKUST-1 membrane for lithium-sulfur batteries, *ACS Appl. Mater. Inter.*, 10 (2018) 30451-30459.

- [7] H. Chen, Y. Xiao, C. Chen, J. Yang, C. Gao, Y. Chen, J. Wu, Y. Shen, W. Zhang, S. Li, Conductive MOF-modified separator for mitigating the shuttle effect of lithium-sulfur battery through a filtration method, *ACS Appl. Mater. Inter.*, 11 (2019) 11459-11465.
- [8] S. Suriyakumar, A.M. Stephan, N. Angulakshmi, M.H. Hassan, M.H. Alkordi, Metal-organic framework@SiO<sub>2</sub> as permselective separator for lithium-sulfur batteries, *J. Mater. Chem. A*, 6 (2018) 14623-14632.
- [9] Y. Song, S. Zhao, Y. Chen, J. Cai, J. Li, Q. Yang, J. Sun, Z. Liu, Enhanced sulfur redox and polysulfide regulation via porous VN-modified separator for Li-S batteries, *ACS Appl. Mater. Inter.*, 11 (2019) 5687-5694.
- [10] X. Liu, G. Feng, Y. Li, C. Xu, Q. Pan, Z. Wu, B. Zhong, X. Guo, S. Zhang, X. Xu, Novel interlayer on the separator with the Cr<sub>3</sub>C<sub>2</sub> compound as a robust polysulfide anchor for lithium-sulfur batteries, *Ind. Eng. Chem. Res.*, 59 (2020) 7538-7545.
- [11] Z. Zhang, J. N. Wang, A. Shao, D. G. Xiong, J. W. Liu, C. Y. Lao, K. Xi, S. Y. Lu, Q. Jiang, J. Yu, Recyclable cobalt-molybdenum bimetallic carbide modified separator boosts the polysulfide adsorption-catalysis of lithium sulfur battery, *Sci. China Mater.*, 63 (2020) 2443-2455.
- [12] Z. Wu, S. Chen, L. Wang, Q. Deng, Z. Zeng, J. Wang, S. Deng, Implanting nickel and cobalt phosphide into well-defined carbon nanocages: A synergistic adsorption-electrocatalysis separator mediator for durable high-power Li-S batteries, *Energy Stor.*

Mater., 38 (2021) 381-388.

- [13] X. Xiang, J.Y. Wu, Q.X. Shi, Q. Xia, Z.G. Xue, X.L. Xie, Y.S. Ye, Mesoporous silica nanoplates facilitating fast  $\text{Li}^+$  diffusion as effective polysulfide-trapping materials for lithium-sulfur batteries, *J. Mater. Chem. A*, 7 (2019) 9110-9119.
- [14] Y. Pang, J. Wei, Y. Wang, Y. Xia, Synergetic protective effect of the ultralight MWCNTs/NCQDs modified separator for highly stable lithium-sulfur batteries, *Adv. Energy Mater.*, 8 (2018) 1702288.
- [15] J. Han, S. Gao, R. Wang, K. Wang, M. Jiang, J. Yan, Q. Jin, K. Jiang, Investigation of the mechanism of metal-organic frameworks preventing polysulfide shuttling from the perspective of composition and structure, *J. Mater. Chem. A*, 8 (2020) 6661-6669.
- [16] Q. Meng, Q. Jin, X. Wang, W. Lv, X. Ma, L. Li, L. Wu, H. Gao, C. Zhu, X. Zhang, 3D  $\text{Ti}_3\text{C}_2\text{Tx}$  aerogel-modified separators for high-performance Li-S batteries, *J. Alloys Compd.*, 816 (2020) 153155.
- [17] Z. Li, S. Jiao, D. Yu, Q. Zhang, K. Liu, J. Han, Z. Guo, J. Liu, L. Wang, Cationic-polymer-functionalized separator as a high-efficiency polysulfide shuttle barrier for long-life Li-S battery, *ACS Appl. Energy Mater.*, 4 (2021) 2914-2921.
